# Supplementary material for: COVID-19 Social Restrictions’ Impact on the Health-Related Physical Fitness of the Police Cadets
Source: MDPI journal article supplement (doi:10.3390/healthcare11131949), 2023-07-05
Supplement: s1 [file s1]

A standard slalom course is made up of four cones (A, B, C and D), placed according to figure 1, and the test (i) begins at A, then a straight line to D, and then back to A; (ii) a standard zig-zag course from A to B, C, D, then back to C, B, A; (iii) then a straight line from A to D, then back to A; and (iv) then a straight line from A to E (finish). The test stopped when the participant: (i) did not start from the stopped position; (ii) did not perform the test course in the correct order; (iii) did not circled the cone (on the outside); or (iv) touched or knocked down any cone.

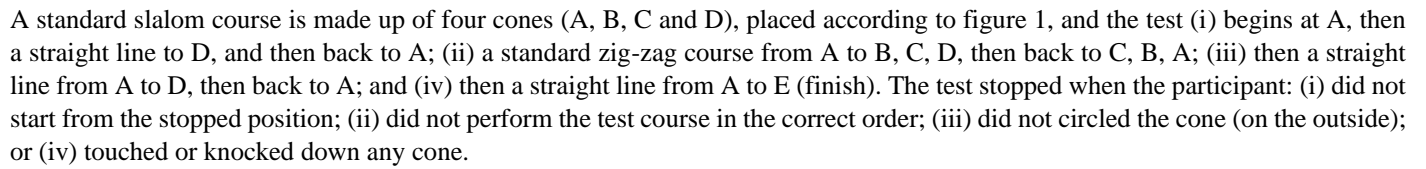

**Table S1.** Changes in anthropometric indicators and physical fitness indicators between pre- and post-pandemic social restrictions within sex

|                                      | Women (n=46)   |                 |              |               |                          | Men (n=110)    |                 |              |               |                          |
|--------------------------------------|----------------|-----------------|--------------|---------------|--------------------------|----------------|-----------------|--------------|---------------|--------------------------|
|                                      | Pre<br>Mean±SD | Post<br>Mean±SD | <i>r</i>     | t             | Effect size <sup>d</sup> | Pre<br>Mean±SD | Post<br>Mean±SD | <i>r</i>     | t             | Effect size <sup>d</sup> |
| <b>Anthropometric indicators</b>     |                |                 |              |               |                          |                |                 |              |               |                          |
| Weight (kg)                          | 61.3±7.5       | 61.1±8.64       | <b>0.950</b> | 0.545         | 0.08                     | 75.4±8.6       | 76.4±8.9        | <b>0.921</b> | <b>-3.208</b> | 0.31                     |
| Body mass index (kg/m <sup>2</sup> ) | 21.9±2.2       | 21.8±2.7        | <b>0.937</b> | 0.557         | 0.08                     | 23.8±2.3       | 24.2±2.4        | <b>0.891</b> | <b>-3.246</b> | 0.31                     |
| <b>Physical fitness</b>              |                |                 |              |               |                          |                |                 |              |               |                          |
| Speed (sec)                          | 4.8±0.2        | 4.9±0.3         | <b>0.870</b> | <b>-3.209</b> | 0.49                     | 4.2±0.2        | 4.2±0.2         | <b>0.760</b> | -1.287        | 0.12                     |
| Agility (sec)                        | 24.7±1.0       | 25.0±1.3        | <b>0.776</b> | <b>-2.204</b> | 0.34                     | 22.5±1.1       | 22.7±1.0        | <b>0.756</b> | <b>-2.855</b> | 0.28                     |
| Cardiorespiratory fitness (no. laps) | 62.1±13.7      | 56.0±13.8       | <b>0.649</b> | <b>3.458</b>  | 0.53                     | 87.7±16.4      | 77.5±17.5       | <b>0.670</b> | <b>7.693</b>  | 0.74                     |
| VO <sub>2</sub> max (ml/kg/min)      | 39.9±4.6       | 37.9±4.7        | <b>0.647</b> | <b>3.327</b>  | 0.52                     | 48.2±4.9       | 45.0±5.4        | <b>0.647</b> | <b>7.751</b>  | 0.75                     |
| Lower body strength (m)              | 2.0±0.2        | 1.9±0.2         | <b>0.860</b> | <b>2.296</b>  | 0.35                     | 2.4±0.1        | 2.4±0.1         | <b>0.742</b> | 0.759         | 0.07                     |
| Flexibility (cm)                     | 56.5±5.7       | 55.6±5.9        | <b>0.785</b> | 1.520         | 0.23                     | 52.2±6.6       | 49.5±7.2        | <b>0.793</b> | <b>6.283</b>  | 0.61                     |
| Static strength (kg <sup>f</sup> )   | 68.4±11.3      | 62.7±11.9       | <b>0.719</b> | <b>4.008</b>  | 0.66                     | 104.1±15.6     | 99.5±14.4       | <b>0.838</b> | <b>5.270</b>  | 0.54                     |
| Abdominal strength (no. reps/60sec)  | 54.1±6.0       | 53.5±6.3        | <b>0.345</b> | 0.532         | 0.08                     | 58.6±6.7       | 56.5±7.7        | <b>0.574</b> | <b>3.128</b>  | 0.30                     |

*r*=Pearson correlation; *t*=pair-sample t-test; <sup>d</sup>=cohen's d; **bold**=*p*<0.05 within sex comparisons (pre- and post-pandemic social restrictions).

sec=seconds; cm=centimetres; no.=number; reps=repetitions.

**Table S2.** Changes in anthropometric indicators and physical fitness indicators between pre- and post-pandemic social restrictions by age.

|                                         | 18-24 years<br>(n=81) |                 |              |               |                             | 25-30 years<br>(n=41) |                 |              |               |                             | 31-36 years<br>(n=34) |                 |              |               |                             |
|-----------------------------------------|-----------------------|-----------------|--------------|---------------|-----------------------------|-----------------------|-----------------|--------------|---------------|-----------------------------|-----------------------|-----------------|--------------|---------------|-----------------------------|
|                                         | Pre<br>Mean±SD        | Post<br>Mean±SD | <i>r</i>     | t             | Effect<br>size <sup>d</sup> | Pre<br>Mean±SD        | Post<br>Mean±SD | <i>r</i>     | t             | Effect<br>size <sup>d</sup> | Pre<br>Mean±SD        | Post<br>Mean±SD | <i>r</i>     | t             | Effect<br>size <sup>d</sup> |
| <b>Anthropometric indicators</b>        |                       |                 |              |               |                             |                       |                 |              |               |                             |                       |                 |              |               |                             |
| Weight (kg)                             | 67.7±9.8              | 67.8±10.3       | <b>0.957</b> | -0.257        | 0.03                        | 77.0±10.0             | 77.9±10.6       | <b>0.948</b> | -1.693        | 0.27                        | 73.1±9.2              | 74.9±10.3       | <b>0.931</b> | <b>-2.892</b> | 0.50                        |
| Body mass index (kg/m <sup>2</sup> )    | 22.4±2.2              | 22.4±2.4        | <b>0.910</b> | -0.143        | 0.02                        | 24.5±2.1              | 24.8±2.5        | <b>0.905</b> | -1.789        | 0.28                        | 23.8±2.4              | 24.4±2.7        | <b>0.896</b> | <b>-2.913</b> | 0.50                        |
| <b>Physical fitness</b>                 |                       |                 |              |               |                             |                       |                 |              |               |                             |                       |                 |              |               |                             |
| Speed (sec)                             | 4.4±0.3               | 4.4±0.3         | <b>0.911</b> | -0.497        | 0.06                        | 4.3±0.3               | 4.4±0.4         | <b>0.935</b> | <b>-2.443</b> | 0.40                        | 4.4±0.4               | 4.5±0.4         | <b>0.946</b> | <b>-2.577</b> | 0.44                        |
| Agility (sec)                           | 23.0±1.3              | 23.2±1.4        | <b>0.889</b> | <b>-2.254</b> | 0.26                        | 22.9±1.6              | 23.1±1.5        | <b>0.880</b> | -1.848        | 0.30                        | 23.4±1.5              | 23.8±1.7        | <b>0.833</b> | <b>-2.110</b> | 0.37                        |
| Cardiorespiratory fitness<br>(no. laps) | 80.5±21.5             | 72.0±20.9       | <b>0.802</b> | <b>5.663</b>  | 0.64                        | 82.4±17.1             | 72.2±17.3       | <b>0.629</b> | <b>4.174</b>  | 0.69                        | 77.9±17.1             | 68.7±16.8       | <b>0.770</b> | <b>4.617</b>  | 0.79                        |
| VO <sub>2 max</sub> (ml/kg/min)         | 46.0±6.6              | 43.2±6.6        | <b>0.788</b> | <b>5.611</b>  | 0.64                        | 46.5±5.4              | 43.3±5.6        | <b>0.640</b> | <b>4.167</b>  | 0.69                        | 45.1±5.4              | 42.2±5.4        | <b>0.775</b> | <b>4.689</b>  | 0.80                        |
| Lower body strength (m)                 | 2.3±0.3               | 2.3±0.3         | <b>0.942</b> | 0.371         | 0.04                        | 2.3±0.2               | 2.3±0.3         | <b>0.889</b> | 0.882         | 0.15                        | 2.3±0.2               | 2.2±0.3         | <b>0.901</b> | 2.009         | 0.35                        |
| Flexibility (cm)                        | 53.2±6.6              | 51.1±7.7        | <b>0.810</b> | <b>4.059</b>  | 0.45                        | 53.7±7.3              | 51.1±7.7        | <b>0.822</b> | <b>3.593</b>  | 0.58                        | 53.7±6.1              | 51.8±6.2        | <b>0.807</b> | <b>2.956</b>  | 0.51                        |
| Static strength (kg <sup>f</sup> )      | 87.7±21.1             | 82.4±20.3       | <b>0.909</b> | <b>3.526</b>  | 0.60                        | 103.9±20.6            | 98.0±21.4       | <b>0.914</b> | <b>3.874</b>  | 0.67                        | 98.8±19.3             | 95.7±19.3       | <b>0.918</b> | <b>2.062</b>  | 0.40                        |
| Abdominal strength<br>(no. reps/60sec)  | 58.7±6.5              | 56.0±7.5        | <b>0.537</b> | <b>5.011</b>  | 0.40                        | 55.6±6.7              | 55.4±7.0        | <b>0.577</b> | 0.264         | 0.04                        | 55.9±7.0              | 55.4±7.9        | <b>0.562</b> | 0.421         | 0.07                        |

*r*=Pearson correlation; *t*=pair-sample *t*-test; <sup>d</sup>=cohen's *d*; **bold**=*p*<0.05.

sec=seconds; cm=centimetres; no.=number; reps=repetitions
